# Supplementary material for: Impacts of pregnane X receptor and cytochrome P450 oxidoreductase gene polymorphisms on trough concentrations of apixaban in patients with non-valvular atrial fibrillation.
Source: Research Square preprint supplement (doi:10.21203/rs.3.rs-1661172/v1), 2022-05-23
Supplement: Supplementary file 1 [file 6ffee6b4b5de499b3edbe437.xlsx]

## Sheet: Table4
Table 4. Stepwise selection multivariate analyses for identification of predictors of trough concentrations of apixaban.
Dependent variable	Explanatory variable	Slope	SRC	SE	P-value	partial R2
C0h	Ccr	-1.485	-0.455	0.306	< 0.001	0.196
	PXR*1B/*1B = 1	55.137	0.283	18.255	0.003	0.057
	POR*28 carrier = 1	-35	-0.211	15.463	0.026	0.046
	Intercept = 272.599
Ccr, creatinine clearance; C0h, trough concentration; SE, standard error; SRC, standarized regression coefficient.
